# Supplementary material for: Spatial Modeling and Review of Human Fecal Waste Re-Use in Rural Oromia, Ethiopia: Biomethane and Nutrient Recovery Potential
Source: Research Square preprint supplement (doi:10.21203/rs.3.rs-7768593/v1), 2025-11-14
Supplement: Supplementary file 1 [file 52ba785dee367ee5be855a7d.xlsx]

## Sheet: Oromia_Admin3Results
OBJECTID	admin2Name	admin3Name	admin3Pcod	PopulationRural2020	PopulationTotal2020	FecesRural_kg	FecesTotal_kg	PhosphorusRuralTonnes	PhosphorusTotalTonnes	NitrogenRuralTonnes	NitrogenTotalTonnes	PotassiumRuralTonnes	PotassiumTotalTonnes	CH4RuralCubicMeter	CH4TotalCubicMeter	EnergyRuralGJ	EnergyTotalGJ
347	West Wellega	Mana Sibu	ET040101	97604	97637	7125092	7127501	7.9801	7.9828	26.4341	26.443	16.3165	16.322	204.561	204.631	7.36421	7.3667
348	West Wellega	Nejo	ET040102	71938	73247	5251474	5347031	5.88165	5.98867	19.483	19.8375	12.0259	12.2447	150.77	153.513	5.42771	5.52648
349	West Wellega	Gimbi	ET040103	85272	95674	6224856	6984202	6.97184	7.82231	23.0942	25.9114	14.2549	15.9938	178.716	200.516	6.43376	7.21859
350	West Wellega	Lalo Asabi	ET040104	88491	117855	6459843	8603415	7.23502	9.63582	23.966	31.9187	14.793	19.7018	185.462	247.004	6.67664	8.89215
351	West Wellega	Kiltu Kara	ET040105	40432	68863	2951536	5026999	3.30572	5.63024	10.9502	18.6502	6.75902	11.5118	84.7386	144.325	3.05059	5.19571
352	West Wellega	Boji Dirmeji	ET040106	41328	66903	3016944	4883919	3.37898	5.46999	11.1929	18.1193	6.9088	11.1842	86.6165	140.217	3.11819	5.04782
353	West Wellega	Ayira	ET040107	62105	88891	4533665	6489043	5.0777	7.26773	16.8199	24.0743	10.3821	14.8599	130.162	186.3	4.68581	6.70682
354	West Wellega	Jarso (West Wellega)	ET040108	55804	75173	4073692	5487629	4.56254	6.14614	15.1134	20.3591	9.32875	12.5667	116.956	157.55	4.21041	5.67179
355	West Wellega	Gudetu Kondole	ET040109	142325	167559	10389725	12231807	11.6365	13.6996	38.5459	45.38	23.7925	28.0108	298.289	351.175	10.7384	12.6423
356	West Wellega	Boji Chekorsa	ET040110	43556	56560	3179588	4128880	3.56114	4.62435	11.7963	15.3181	7.28126	9.45514	91.286	118.54	3.28629	4.26745
357	West Wellega	Babo	ET040111	83446	105740	6091558	7719020	6.82254	8.6453	22.5997	28.6376	13.9497	17.6766	174.889	221.613	6.29599	7.97807
358	West Wellega	Yubdo	ET040112	37618	47428	2746114	3462244	3.07565	3.87771	10.1881	12.8449	6.2886	7.92854	78.8409	99.401	2.83827	3.57844
359	West Wellega	Gaji	ET040113	93629	114063	6834917	8326599	7.65511	9.32579	25.3575	30.8917	15.652	19.0679	196.23	239.057	7.0643	8.60604
360	West Wellega	Haru	ET040114	94572	103279	6903756	7539367	7.73221	8.44409	25.6129	27.9711	15.8096	17.2652	198.207	216.455	7.13545	7.79239
361	West Wellega	Nole Kaba	ET040115	93522	139823	6827106	10207079	7.64636	11.4319	25.3286	37.8683	15.6341	23.3742	196.006	293.045	7.05622	10.5496
362	West Wellega	Begi	ET040116	111050	176385	8106650	12876105	9.07945	14.4212	30.0757	47.7703	18.5642	29.4863	232.742	369.673	8.37871	13.3082
363	West Wellega	Homa	ET040117	35764	35764	2610772	2610772	2.92406	2.92406	9.68596	9.68596	5.97867	5.97867	74.9553	74.9553	2.69839	2.69839
364	West Wellega	Sayo Nole	ET040118	78913	89089	5760649	6503497	6.45193	7.28392	21.372	24.128	13.1919	14.893	165.388	186.715	5.95398	6.72175
365	West Wellega	Guliso	ET040119	83454	121902	6092142	8898846	6.8232	9.96671	22.6018	33.0147	13.951	20.3784	174.905	255.486	6.29659	9.19749
366	West Wellega	Gimbi town	ET040193	9633	67490	703209	4926770	0.787594	5.51798	2.60891	18.2783	1.61035	11.2823	20.1891	141.448	0.726809	5.09211
367	West Wellega	Leta Sibu	ET040197	32124	49675	2345052	3626275	2.62646	4.06143	8.70014	13.4535	5.37017	8.30417	67.3264	104.11	2.42375	3.74797
368	West Wellega	Mendi town	ET040198	2972	112047	216956	8179431	0.242991	9.16096	0.804907	30.3457	0.496829	18.7309	6.22881	234.831	0.224237	8.45393
369	West Wellega	Nejo town	ET040199	9774	77766	713502	5676918	0.799122	6.35815	2.64709	21.0614	1.63392	13.0001	20.4846	162.984	0.737447	5.86744
370	East Wellega	Limu (OR)	ET040201	88109	122602	6431957	8949946	7.20379	10.0239	23.8626	33.2043	14.7292	20.4954	184.661	256.953	6.64781	9.25031
371	East Wellega	Ibantu	ET040202	43777	55740	3195721	4069020	3.57921	4.5573	11.8561	15.0961	7.3182	9.31806	91.7491	116.822	3.30297	4.20558
372	East Wellega	Gida Ayana	ET040203	80537	180219	5879201	13155987	6.58471	14.7347	21.8118	48.8087	13.4634	30.1272	168.792	377.708	6.07651	13.5975
373	East Wellega	Haro Limu	ET040204	69401	85714	5066273	6257122	5.67423	7.00798	18.7959	23.2139	11.6018	14.3288	145.453	179.642	5.2363	6.46711
374	East Wellega	Boneya Boshe	ET040205	58331	72557	4258163	5296661	4.76914	5.93226	15.7978	19.6506	9.75119	12.1294	122.252	152.067	4.40107	5.47442
375	East Wellega	Wayu Tuka	ET040206	47354	74104	3456842	5409592	3.87166	6.05874	12.8249	20.0696	7.91617	12.388	99.2459	155.309	3.57285	5.59114
376	East Wellega	Bila Seyo	ET040207	56244	82856	4105812	6048488	4.59851	6.77431	15.2326	22.4399	9.40231	13.851	117.878	173.652	4.2436	6.25148
377	East Wellega	Gobu Seyo	ET040208	34269	56928	2501637	4155744	2.80183	4.65443	9.28107	15.4178	5.72875	9.51665	71.822	119.311	2.58559	4.29521
378	East Wellega	Sibu Sire	ET040209	109871	168086	8020583	12270278	8.98305	13.7427	29.7564	45.5227	18.3671	28.0989	230.271	352.28	8.28975	12.6821
379	East Wellega	Diga	ET040210	57037	85338	4163701	6229674	4.66335	6.97723	15.4473	23.1121	9.53488	14.266	119.54	178.854	4.30343	6.43874
380	East Wellega	Sasiga	ET040211	105544	122257	7704712	8924761	8.62928	9.99573	28.5845	33.1109	17.6438	20.4377	221.202	256.23	7.96328	9.22428
381	East Wellega	Leka Dulecha	ET040212	82156	131318	5997388	9586214	6.71707	10.7366	22.2503	35.5649	13.734	21.9524	172.185	275.22	6.19866	9.90793
382	East Wellega	Guto Gida	ET040213	93034	140946	6791482	10289058	7.60646	11.5237	25.1964	38.1724	15.5525	23.5619	194.983	295.399	7.0194	10.6344
383	East Wellega	Jimma Arjo	ET040214	105742	146879	7719166	10722167	8.64547	12.0088	28.6381	39.7792	17.6769	24.5538	221.617	307.833	7.97822	11.082
384	East Wellega	Nunu Kumba	ET040215	64096	103143	4679008	7529439	5.24049	8.43297	17.3591	27.9342	10.7149	17.2424	134.334	216.17	4.83604	7.78213
385	East Wellega	Wama Hagalo	ET040216	75947	88570	5544131	6465610	6.20943	7.24148	20.5687	23.9874	12.6961	14.8062	159.172	185.628	5.73019	6.6826
386	East Wellega	Kiremu	ET040217	54345	76397	3967185	5576981	4.44325	6.24622	14.7183	20.6906	9.08485	12.7713	113.898	160.115	4.10032	5.76414
387	East Wellega	Nekemte town	ET040297	5443	171539	397339	12522347	0.44502	14.025	1.47413	46.4579	0.909906	28.6762	11.4076	359.517	0.410674	12.9426
388	Ilu Aba Bora	Darimu	ET040301	176351	249300	12873623	18198900	14.4185	20.3828	47.7611	67.5179	29.4806	41.6755	369.602	522.49	13.3057	18.8097
389	Ilu Aba Bora	Alge Sachi	ET040302	89632	124539	6543136	9091347	7.32831	10.1823	24.275	33.7289	14.9838	20.8192	187.853	261.013	6.76272	9.39645
390	Ilu Aba Bora	Yayu	ET040309	49395	94563	3605835	6903099	4.03854	7.73147	13.3776	25.6105	8.25736	15.8081	103.524	198.188	3.72685	7.13477
391	Ilu Aba Bora	Metu Zuria	ET040310	69038	102283	5039774	7466659	5.64455	8.36266	18.6976	27.7013	11.5411	17.0986	144.692	214.368	5.20891	7.71724
392	Ilu Aba Bora	Ale	ET040311	64781	125779	4729013	9181867	5.29649	10.2837	17.5446	34.0647	10.8294	21.0265	135.77	263.611	4.88772	9.49001
393	Ilu Aba Bora	Bure (OR)	ET040312	50701	80740	3701173	5894020	4.14531	6.6013	13.7314	21.8668	8.47569	13.4973	106.261	169.217	3.82538	6.09182
394	Ilu Aba Bora	Sale Nono	ET040313	26356	37378	1923988	2728594	2.15487	3.05603	7.138	10.1231	4.40593	6.24848	55.2377	78.3379	1.98856	2.82017
395	Ilu Aba Bora	Becho (Ilu Aba Bora)	ET040314	37698	46659	2751954	3406107	3.08219	3.81484	10.2097	12.6367	6.30197	7.79999	79.0086	97.7893	2.84431	3.52042
396	Ilu Aba Bora	Bilo Nopha	ET040315	26688	41804	1948224	3051692	2.18201	3.4179	7.22791	11.3218	4.46143	6.98837	55.9335	87.6141	2.01361	3.15411
397	Ilu Aba Bora	Hurumu	ET040316	36225	53276	2644425	3889148	2.96176	4.35585	9.81082	14.4287	6.05573	8.90615	75.9214	111.657	2.73317	4.01967
398	Ilu Aba Bora	Didu	ET040317	25438	33455	1856974	2442215	2.07981	2.73528	6.88937	9.06062	4.25247	5.59267	53.3137	70.116	1.91929	2.52418
399	Ilu Aba Bora	Halu /Huka	ET040319	22735	32345	1659655	2361185	1.85881	2.64453	6.15732	8.76	3.80061	5.40711	47.6487	67.7896	1.71535	2.44043
400	Ilu Aba Bora	Metu town	ET040320	1892	47852	138116	3493196	0.15469	3.91238	0.51241	12.9598	0.316286	7.99942	3.96531	100.29	0.142751	3.61043
401	Ilu Aba Bora	Dorani	ET040324	44095	70085	3218935	5116205	3.60521	5.73015	11.9422	18.9811	7.37136	11.7161	92.4156	146.886	3.32696	5.2879
402	Jimma	Limu Seka	ET040401	158529	197800	11572617	14439400	12.9613	16.1721	42.9344	53.5702	26.5013	33.0662	332.25	414.555	11.961	14.924
403	Jimma	Limu Kosa	ET040402	172214	251244	12571622	18340812	14.0802	20.5417	46.6407	68.0444	28.789	42.0005	360.931	526.565	12.9935	18.9563
404	Jimma	Sekoru	ET040403	164527	214126	12010471	15631198	13.4517	17.5069	44.5588	57.9917	27.504	35.7954	344.821	448.772	12.4135	16.1558
405	Jimma	Tiro Afeta	ET040404	136854	190964	9990342	13940372	11.1892	15.6132	37.0642	51.7188	22.8779	31.9235	286.823	400.228	10.3256	14.4082
406	Jimma	Kersa (Jimma)	ET040405	181122	240927	13221906	17587671	14.8085	19.6982	49.0533	65.2503	30.2782	40.2758	379.601	504.942	13.6656	18.1779
407	Jimma	Mena (Jimma)	ET040406	179675	224413	13116275	16382149	14.6902	18.348	48.6614	60.7778	30.0363	37.5151	376.568	470.331	13.5565	16.9319
408	Jimma	Goma	ET040407	279007	360907	20367511	26346211	22.8116	29.5078	75.5635	97.7444	46.6416	60.3328	584.751	756.4	21.051	27.2304
409	Jimma	Gera	ET040408	105871	188386	7728583	13752178	8.65601	15.4024	28.673	51.0206	17.6985	31.4925	221.888	394.825	7.98795	14.2137
410	Jimma	Seka Chekorsa	ET040409	261244	370682	19070812	27059786	21.3593	30.307	70.7527	100.392	43.6722	61.9669	547.523	776.886	19.7108	27.9679
411	Jimma	Dedo	ET040410	210635	266960	15376355	19488080	17.2215	21.8266	57.0463	72.3008	35.2119	44.6277	441.455	559.503	15.8924	20.1421
412	Jimma	Omo Nada	ET040411	152789	292331	11153597	21340163	12.492	23.901	41.3798	79.172	25.5417	48.869	320.22	612.676	11.5279	22.0563
413	Jimma	Sigmo	ET040412	84683	162005	6181859	11826365	6.92368	13.2455	22.9347	43.8758	14.1565	27.0824	177.481	339.535	6.38932	12.2233
414	Jimma	Setema	ET040413	113658	155349	8297034	11340477	9.29268	12.7013	30.782	42.0732	19.0002	25.9697	238.208	325.585	8.57548	11.7211
415	Jimma	Shebe Sambo	ET040414	78406	115963	5723638	8465299	6.41047	9.48113	21.2347	31.4063	13.1071	19.3855	164.326	243.039	5.91572	8.74939
416	Jimma	Chora (Jimma)	ET040415	68215	74135	4979695	5411855	5.57726	6.06128	18.4747	20.078	11.4035	12.3931	142.967	155.374	5.14681	5.59348
417	Jimma	Gumay	ET040416	47010	69595	3431730	5080435	3.84354	5.69009	12.7317	18.8484	7.85866	11.6342	98.525	145.859	3.5469	5.25093
418	Jimma	Agaro town	ET040417	375	79345	27375	5792185	0.03066	6.48725	0.101561	21.489	0.0626888	13.2641	0.785936	166.294	0.0282937	5.98657
419	Jimma	Jimma town	ET040418	27199	314044	1985527	22925212	2.22379	25.6762	7.36631	85.0525	4.54686	52.4987	57.0045	658.183	2.05216	23.6946
420	Jimma	Mancho	ET040490	171523	210610	12521179	15374530	14.0237	17.2195	46.4536	57.0395	28.6735	35.2077	359.483	441.403	12.9414	15.8905
421	Jimma	Omo Beyam	ET040491	73030	98820	5331190	7213860	5.97093	8.07952	19.7787	26.7634	12.2084	16.5197	153.058	207.11	5.5101	7.45596
422	Jimma	Botor Tolay	ET040495	64068	97117	4676964	7089541	5.2382	7.94029	17.3515	26.3022	10.7102	16.235	134.276	203.541	4.83392	7.32747
423	Jimma	Nono Benja	ET040499	82236	114617	6003228	8367041	6.72362	9.37109	22.272	31.0417	13.7474	19.1605	172.353	240.218	6.2047	8.64784
424	West Shewa	Illu Galan	ET040500	50464	91154	3683872	6654242	4.12594	7.45275	13.6672	24.6872	8.43607	15.2382	105.764	191.043	3.8075	6.87756
425	West Shewa	Ginde Beret	ET040501	66828	157511	4878444	11498303	5.46386	12.8781	18.099	42.6587	11.1716	26.3311	140.06	330.116	5.04216	11.8842
426	West Shewa	Jeldu	ET040502	142851	256784	10428123	18745232	11.6795	20.9947	38.6883	69.5448	23.8804	42.9266	299.391	538.176	10.7781	19.3743
427	West Shewa	Ambo Zuria	ET040503	75338	108177	5499674	7896921	6.15963	8.84455	20.4038	29.2976	12.5943	18.0839	157.896	226.721	5.68424	8.16194
428	West Shewa	Mida Kegn	ET040504	108113	149922	7892249	10944306	8.83932	12.2576	29.2802	40.6034	18.0733	25.0625	226.586	314.211	8.15711	11.3116
429	West Shewa	Cheliya	ET040505	64742	110731	4726166	8083363	5.29331	9.05337	17.5341	29.9893	10.8229	18.5109	135.688	232.073	4.88478	8.35464
430	West Shewa	Bako Tibe	ET040506	88336	203818	6448528	14878714	7.22235	16.6642	23.924	55.2	14.7671	34.0723	185.137	427.168	6.66494	15.378
431	West Shewa	Dano	ET040507	93783	160763	6846159	11735699	7.6677	13.144	25.3992	43.5394	15.6777	26.8748	196.553	336.932	7.07592	12.1295
432	West Shewa	Nono	ET040508	82648	133862	6033304	9771926	6.7573	10.9446	22.3836	36.2538	13.8163	22.3777	173.216	280.552	6.23578	10.0999
433	West Shewa	Tikur Enchini	ET040509	70211	95070	5125403	6940110	5.74045	7.77292	19.0152	25.7478	11.7372	15.8929	147.15	199.251	5.29741	7.17302
434	West Shewa	Dendi	ET040510	109636	181308	8003428	13235484	8.96384	14.8237	29.6927	49.1036	18.3279	30.3093	229.778	379.991	8.27202	13.6797
435	West Shewa	Ejere /Addis Alem	ET040511	78869	128765	5757437	9399845	6.44833	10.5278	21.3601	34.8734	13.1845	21.5256	165.296	269.87	5.95066	9.7153
436	West Shewa	Adda Berga	ET040513	101772	186851	7429356	13640123	8.32088	15.2769	27.5629	50.6049	17.0132	31.2359	213.297	391.608	7.67869	14.0979
437	West Shewa	Meta Robi	ET040514	84745	135659	6186385	9903107	6.92875	11.0915	22.9515	36.7405	14.1668	22.6781	177.611	284.318	6.394	10.2355
438	West Shewa	Ambo town	ET040515	5216	141636	380768	10339428	0.42646	11.5802	1.41265	38.3593	0.871959	23.6773	10.9318	296.845	0.393547	10.6864
439	West Shewa	Abuna Ginde Beret	ET040516	120247	189849	8778031	13858977	9.83139	15.5221	32.5665	51.4168	20.1017	31.7371	252.017	397.891	9.07262	14.3241
440	West Shewa	Toke Kutaye	ET040517	88338	182753	6448674	13340969	7.22251	14.9419	23.9246	49.495	14.7675	30.5508	185.141	383.019	6.66509	13.7887
441	West Shewa	Jibat	ET040518	73869	107210	5392437	7826330	6.03953	8.76549	20.0059	29.0357	12.3487	17.9223	154.817	224.694	5.57341	8.08898
442	West Shewa	Ifata	ET040519	62019	95368	4527387	6961864	5.07067	7.79729	16.7966	25.8285	10.3677	15.9427	129.981	199.875	4.67933	7.1955
443	West Shewa	Ejersa Lafo	ET040590	54029	79398	3944117	5796054	4.41741	6.49158	14.6327	21.5034	9.03203	13.273	113.236	166.405	4.07648	5.99057
444	West Shewa	Cobi	ET040592	43712	67581	3190976	4933413	3.57389	5.52542	11.8385	18.303	7.30734	11.2975	91.6129	141.638	3.29807	5.09898
445	West Shewa	Meta Walkite	ET040594	54286	84904	3962878	6197992	4.43842	6.94175	14.7023	22.9946	9.07499	14.1934	113.774	177.944	4.09587	6.406
446	West Shewa	Liban Jawi	ET040597	57100	78359	4168300	5720207	4.6685	6.40663	15.4644	21.222	9.54541	13.0993	119.672	164.227	4.30819	5.91218
447	North Shewa (OR)	Wara Jarso	ET040601	153805	222280	11227765	16226440	12.5751	18.1736	41.655	60.2001	25.7116	37.1585	322.349	465.861	11.6046	16.771
448	North Shewa (OR)	Dera (OR)	ET040602	170342	294858	12434966	21524634	13.9272	24.1076	46.1337	79.8564	28.4761	49.2914	357.008	617.972	12.8523	22.247
449	North Shewa (OR)	Hidabu Abote	ET040603	92381	140386	6743813	10248178	7.55307	11.478	25.0195	38.0207	15.4433	23.4683	193.615	294.225	6.97014	10.5921
450	North Shewa (OR)	Kuyu	ET040604	74143	172127	5412439	12565271	6.06193	14.0731	20.0801	46.6172	12.3945	28.7745	155.391	360.749	5.59408	12.987
451	North Shewa (OR)	Degem	ET040605	104840	165150	7653320	12055950	8.57172	13.5027	28.3938	44.7276	17.5261	27.6081	219.727	346.126	7.91017	12.4605
452	North Shewa (OR)	Gerar Jarso	ET040606	93480	103263	6824040	7538199	7.64292	8.44278	25.3172	27.9667	15.6271	17.2625	195.918	216.422	7.05305	7.79118
453	North Shewa (OR)	Debre Libanos	ET040607	62593	97962	4569289	7151226	5.1176	8.00937	16.9521	26.531	10.4637	16.3763	131.184	205.312	4.72263	7.39122
454	North Shewa (OR)	Wuchale	ET040608	120111	178968	8768103	13064664	9.82028	14.6324	32.5297	48.4699	20.079	29.9181	251.732	375.087	9.06236	13.5031
455	North Shewa (OR)	Abichugna Gne'a	ET040609	93642	110893	6835866	8095189	7.65617	9.06661	25.3611	30.0332	15.6541	18.538	196.258	232.413	7.06528	8.36686
456	North Shewa (OR)	Kimbibit	ET040610	106677	131848	7787421	9624904	8.72191	10.7799	28.8913	35.7084	17.8332	22.041	223.577	276.331	8.04877	9.94792
457	North Shewa (OR)	Fiche town	ET040613	2623	47926	191479	3498598	0.214456	3.91843	0.710387	12.9798	0.438487	8.01179	5.49736	100.445	0.197905	3.61601
458	North Shewa (OR)	Yaya Gulele	ET040614	64257	84814	4690761	6191422	5.25365	6.93439	17.4027	22.9702	10.7418	14.1784	134.672	177.756	4.84818	6.39921
459	North Shewa (OR)	Jida	ET040615	61741	89901	4507093	6562773	5.04794	7.35031	16.7213	24.3479	10.3212	15.0288	129.399	188.417	4.65835	6.78302
460	North Shewa (OR)	Aleltu	ET040617	59893	92388	4372189	6744324	4.89685	7.55364	16.2208	25.0214	10.0123	15.4445	125.526	193.63	4.51892	6.97066
461	East Shewa	Fentale	ET040701	46378	104192	3385594	7606016	3.79187	8.51874	12.5606	28.2183	7.75301	17.4178	97.2004	218.369	3.49921	7.86127
462	East Shewa	Boset	ET040702	103665	221919	7567545	16200087	8.47565	18.1441	28.0756	60.1023	17.3297	37.0982	217.264	465.104	7.82151	16.7438
463	East Shewa	Adama	ET040703	59383	107973	4334959	7882029	4.85515	8.82787	16.0827	29.2423	9.92706	18.0498	124.457	226.293	4.48044	8.14655
464	East Shewa	Lome (OR)	ET040704	70425	120859	5141025	8822707	5.75795	9.88143	19.0732	32.7322	11.7729	20.204	147.599	253.3	5.31356	9.1188
465	East Shewa	Gimbichu	ET040705	97564	135566	7122172	9896318	7.97683	11.0839	26.4233	36.7153	16.3098	22.6626	204.478	284.123	7.36119	10.2284
466	East Shewa	Ada'a	ET040706	75109	144157	5482957	10523461	6.14091	11.7863	20.3418	39.042	12.556	24.0987	157.416	302.129	5.66697	10.8766
467	East Shewa	Dugda	ET040707	89378	224712	6524594	16403976	7.30755	18.3725	24.2062	60.8588	14.9413	37.5651	187.321	470.958	6.74356	16.9545
468	East Shewa	Adama Tulu Jido Kombolcha	ET040708	92381	327464	6743813	23904872	7.55307	26.7735	25.0195	88.6871	15.4433	54.7422	193.615	686.309	6.97014	24.7071
469	East Shewa	Bishoftu town	ET040709	24354	316008	1777842	23068584	1.99118	25.8368	6.59579	85.5844	4.07126	52.8271	51.0418	662.299	1.83751	23.8428
470	East Shewa	Bora (OR)	ET040710	53758	106437	3924334	7769901	4.39525	8.70229	14.5593	28.8263	8.98672	17.7931	112.668	223.074	4.05603	8.03066
471	East Shewa	Liben Chukala	ET040711	82632	94649	6032136	6909377	6.75599	7.7385	22.3792	25.6338	13.8136	15.8225	173.183	198.368	6.23457	7.14126
472	East Shewa	Adama town	ET040714	12003	520688	876219	38010224	0.981365	42.5715	3.25077	141.018	2.00654	87.0434	25.1562	1091.27	0.905625	39.2858
473	East Shewa	Mojo Town	ET040797	13807	96284	1007911	7028732	1.12886	7.87218	3.73935	26.0766	2.30812	16.0958	28.9371	201.795	1.04174	7.26462
474	East Shewa	Metehara town	ET040799	188	34300	13724	2503900	0.0153709	2.80437	0.050916	9.28947	0.031428	5.73393	0.394016	71.887	0.0141846	2.58793
475	Arsi	Merti	ET040801	75499	145460	5511427	10618580	6.1728	11.8928	20.4474	39.3949	12.6212	24.3165	158.233	304.859	5.69639	10.9749
476	Arsi	Aseko	ET040802	92510	123401	6753230	9008273	7.56362	10.0893	25.0545	33.4207	15.4649	20.6289	193.885	258.628	6.97987	9.31059
477	Arsi	Golocha	ET040803	93009	172232	6789657	12572936	7.60442	14.0817	25.1896	46.6456	15.5483	28.792	194.931	360.969	7.01752	12.9949
478	Arsi	Jeju	ET040804	156010	209538	11388730	15296274	12.7554	17.1318	42.2522	56.7492	26.0802	35.0285	326.97	439.156	11.7709	15.8096
479	Arsi	Dodota	ET040805	33978	111453	2480394	8136069	2.77804	9.1124	9.20226	30.1848	5.6801	18.6316	71.2121	233.587	2.56364	8.40912
480	Arsi	Ziway Dugda	ET040806	127047	168030	9274431	12266190	10.3874	13.7381	34.4081	45.5076	21.2384	28.0896	266.269	352.162	9.58568	12.6778
481	Arsi	Hitosa	ET040807	95610	204072	6979530	14897256	7.81707	16.6849	25.8941	55.2688	15.9831	34.1147	200.382	427.7	7.21376	15.3972
482	Arsi	Sude	ET040808	192445	237633	14048485	17347209	15.7343	19.4289	52.1199	64.3581	32.171	39.7251	403.332	498.038	14.52	17.9294
483	Arsi	Chole	ET040809	101926	141850	7440598	10355050	8.33347	11.5977	27.6046	38.4172	17.039	23.7131	213.62	297.293	7.6903	10.7026
484	Arsi	Amigna	ET040810	79342	114061	5791966	8326453	6.487	9.32563	21.4882	30.8911	13.2636	19.0676	166.287	239.052	5.98634	8.60589
485	Arsi	Seru	ET040811	46575	74325	3399975	5425725	3.80797	6.07681	12.6139	20.1294	7.78594	12.4249	97.6133	155.773	3.51408	5.60781
486	Arsi	Robe	ET040812	155774	271784	11371502	19840232	12.7361	22.2211	42.1883	73.6073	26.0407	45.4341	326.476	569.613	11.7531	20.5061
487	Arsi	Tena	ET040813	75549	106957	5515077	7807861	6.17689	8.7448	20.4609	28.9672	12.6295	17.88	158.338	224.164	5.70016	8.06989
488	Arsi	Shirka	ET040814	163214	274254	11914622	20020542	13.3444	22.423	44.2032	74.2762	27.2845	45.847	342.069	574.79	12.3145	20.6924
489	Arsi	Degeluna Tijo	ET040815	139893	220837	10212189	16121101	11.4377	18.0556	37.8872	59.8093	23.3859	36.9173	293.192	462.837	10.5549	16.6621
490	Arsi	Tiyo	ET040816	60407	141575	4409711	10334975	4.93888	11.5752	16.36	38.3428	10.0982	23.6671	126.603	296.717	4.5577	10.6818
491	Arsi	Munessa	ET040817	177344	270145	12946112	19720585	14.4996	22.0871	48.0301	73.1634	29.6466	45.1601	371.683	566.178	13.3806	20.3824
492	Arsi	Limu Bilbilo	ET040818	162953	228920	11895569	16711160	13.323	18.7165	44.1326	61.9984	27.2409	38.2686	341.522	479.777	12.2948	17.272
493	Arsi	Guna	ET040819	88755	123786	6479115	9036378	7.25661	10.1207	24.0375	33.525	14.8372	20.6933	186.015	259.434	6.69655	9.33964
494	Arsi	Sire	ET040820	87801	123276	6409473	8999148	7.17861	10.079	23.7791	33.3868	14.6777	20.608	184.016	258.366	6.62457	9.30116
495	Arsi	Lude Hitosa	ET040821	101936	168590	7441328	12307070	8.33429	13.7839	27.6073	45.6592	17.0406	28.1832	213.641	353.336	7.69106	12.7201
496	Arsi	Diksis	ET040822	81587	108881	5955851	7948313	6.67055	8.90211	22.0962	29.4882	13.6389	18.2016	170.992	228.196	6.15573	8.21506
497	Arsi	Bele Gesgar	ET040823	73128	129652	5338344	9464596	5.97895	10.6003	19.8053	35.1137	12.2248	21.6739	153.264	271.729	5.5175	9.78223
498	Arsi	Inkolo Wabe	ET040824	52583	92884	3838559	6780532	4.29919	7.5942	14.2411	25.1558	8.7903	15.5274	110.205	194.669	3.96738	7.00809
499	Arsi	Asela town	ET040825	2579	113380	188267	8276740	0.210859	9.26995	0.698471	30.7067	0.431131	18.9537	5.40515	237.625	0.194585	8.55451
500	Arsi	Shanan Kolu	ET040893	89408	96043	6526784	7011139	7.31	7.85248	24.2144	26.0113	14.9463	16.0555	187.384	201.29	6.74582	7.24643
501	Arsi	Bekoji town	ET040894	323	70988	23579	5182124	0.0264085	5.80398	0.0874781	19.2257	0.0539959	11.8671	0.676953	148.779	0.0243703	5.35604
502	West Hararge	Mieso	ET040901	90483	149028	6605259	10879044	7.39789	12.1845	24.5055	40.3613	15.126	24.913	189.637	312.337	6.82693	11.2441
503	West Hararge	Doba	ET040902	169064	206200	12341672	15052600	13.8227	16.8589	45.7876	55.8451	28.2624	34.4705	354.329	432.16	12.7559	15.5578
504	West Hararge	Tulo (OR)	ET040903	171342	236697	12507966	17278881	14.0089	19.3523	46.4046	64.1046	28.6432	39.5686	359.104	496.077	12.9277	17.8588
505	West Hararge	Mesela	ET040904	177981	224016	12992613	16353168	14.5517	18.3155	48.2026	60.6703	29.7531	37.4488	373.018	469.499	13.4286	16.902
506	West Hararge	Chiro town	ET040905	158	98172	11534	7166556	0.0129181	8.02654	0.0427911	26.5879	0.0264129	16.4114	0.331141	205.752	0.0119211	7.40707
507	West Hararge	Anchar	ET040906	78340	129650	5718820	9464450	6.40508	10.6002	21.2168	35.1131	13.0961	21.6736	164.187	271.724	5.91074	9.78208
508	West Hararge	Goba Koricha	ET040907	114725	152821	8374925	11155933	9.37992	12.4946	31.071	41.3885	19.1786	25.5471	240.444	320.287	8.65599	11.5303
509	West Hararge	Habro	ET040908	207079	323177	15116767	23591921	16.9308	26.423	56.0832	87.526	34.6174	54.0255	434.002	677.324	15.6241	24.3837
510	West Hararge	Daro Lebu	ET040909	173074	278306	12634402	20316338	14.1505	22.7543	46.8736	75.3736	28.9328	46.5244	362.734	583.282	13.0584	20.9982
511	West Hararge	Boke	ET040910	152635	208658	11142355	15232034	12.4794	17.0599	41.3381	56.5108	25.516	34.8814	319.897	437.312	11.5163	15.7432
512	West Hararge	Kuni /Oda Bultum	ET040911	230768	266118	16846064	19426614	18.8676	21.7578	62.4989	72.0727	38.5775	44.4869	483.65	557.738	17.4114	20.0786
513	West Hararge	Gemechis	ET040912	226500	290702	16534500	21221246	18.5186	23.7678	61.343	78.7308	37.864	48.5967	474.705	609.262	17.0894	21.9334
514	West Hararge	Chiro Zuria	ET040913	177136	250813	12930928	18309349	14.4826	20.5065	47.9737	67.9277	29.6118	41.9284	371.247	525.661	13.3649	18.9238
515	West Hararge	Bedesa	ET040914	741	31808	54093	2321984	0.0605842	2.60062	0.200685	8.61456	0.123873	5.31734	1.55301	66.6642	0.0559084	2.39991
516	West Hararge	Hawi Gudina	ET040915	52335	67102	3820455	4898446	4.27891	5.48626	14.1739	18.1732	8.74884	11.2174	109.685	140.634	3.94867	5.06284
517	West Hararge	Gumbi Bordede	ET040991	77977	85341	5692321	6229893	6.3754	6.97748	21.1185	23.1129	13.0354	14.2665	163.427	178.86	5.88336	6.43897
518	West Hararge	Burqua Dhintu	ET040998	25290	31551	1846170	2303223	2.06771	2.57961	6.84929	8.54496	4.22773	5.27438	53.0035	66.1255	1.90813	2.38052
519	East Hararge	Babile town	ET041000	193	50665	14089	3698545	0.0157797	4.14237	0.0522702	13.7216	0.0322638	8.46967	0.404495	106.185	0.0145618	3.82267
520	East Hararge	Kombolcha	ET041001	173104	212433	12636592	15507609	14.153	17.3685	46.8818	57.5332	28.9378	35.5124	362.797	445.223	13.0607	16.028
521	East Hararge	Jarso (East Hararghe)	ET041002	144917	182458	10578941	13319434	11.8484	14.9178	39.2479	49.4151	24.2258	30.5015	303.721	382.401	10.934	13.7664
522	East Hararge	Gursum (OR)	ET041003	199557	282811	14567661	20645203	16.3158	23.1226	54.046	76.5937	33.3599	47.2775	418.238	592.724	15.0566	21.3381
523	East Hararge	Babile (OR)	ET041004	90100	103026	6577300	7520898	7.36658	8.42341	24.4018	27.9025	15.062	17.2229	188.834	215.925	6.79803	7.7733
524	East Hararge	Fedis	ET041005	111288	138915	8124024	10140795	9.09891	11.3577	30.1401	37.6223	18.604	23.2224	233.241	291.142	8.39667	10.4811
525	East Hararge	Haro Maya	ET041006	255051	279081	18618723	20372913	20.853	22.8177	69.0755	75.5835	42.6369	46.654	534.544	584.906	19.2436	21.0566
526	East Hararge	Kurfa Chele	ET041007	76768	95793	5604064	6992889	6.27655	7.83204	20.7911	25.9436	12.8333	16.0137	160.893	200.766	5.79214	7.22757
527	East Hararge	Kersa (East Hararge)	ET041008	240515	287597	17557595	20994581	19.6645	23.5139	65.1387	77.8899	40.2069	48.0776	504.079	602.754	18.1468	21.6992
528	East Hararge	Meta	ET041009	209082	285744	15262986	20859312	17.0945	23.3624	56.6257	77.388	34.9522	47.7678	438.2	598.871	15.7752	21.5594
529	East Hararge	Goro Gutu	ET041010	182008	312985	13286584	22847905	14.881	25.5897	49.2932	84.7657	30.4263	52.3217	381.458	655.963	13.7325	23.6147
530	East Hararge	Deder	ET041011	268383	331273	19591959	24182929	21.943	27.0849	72.6862	89.7187	44.8656	55.3789	562.485	694.292	20.2495	24.9945
531	East Hararge	Melka Balo	ET041012	242020	291030	17667460	21245190	19.7876	23.7946	65.5463	78.8197	40.4585	48.6515	507.233	609.949	18.2604	21.9582
532	East Hararge	Bedeno	ET041013	341320	384415	24916360	28062295	27.9063	31.4298	92.4397	104.111	57.0585	64.2627	715.349	805.668	25.7526	29.0041
533	East Hararge	Midhaga Tola	ET041014	141438	159816	10324974	11666568	11.564	13.0666	38.3057	43.283	23.6442	26.7164	296.43	334.947	10.6715	12.0581
534	East Hararge	Chinaksen	ET041015	85093	145166	6211789	10597118	6.9572	11.8688	23.0457	39.3153	14.225	24.2674	178.34	304.243	6.42026	10.9528
535	East Hararge	Girawa	ET041016	305138	360836	22275074	26341028	24.9481	29.502	82.6405	97.7252	51.0099	60.321	639.517	756.251	23.0226	27.225
536	East Hararge	Golo Oda	ET041017	89208	174576	6512184	12744048	7.29365	14.2733	24.1602	47.2804	14.9129	29.1839	186.965	365.882	6.73073	13.1717
537	East Hararge	Meyu Muleke	ET041018	40481	70519	2955113	5147887	3.30973	5.76563	10.9635	19.0987	6.76721	11.7887	84.8413	147.796	3.05429	5.32065
538	East Hararge	Haromaya town	ET041019	1106	37782	80738	2758086	0.0904266	3.08906	0.299538	10.2325	0.18489	6.31602	2.31799	79.1846	0.0834476	2.85065
539	East Hararge	Goro Muti	ET041089	109922	119589	8024306	8729997	8.98722	9.7776	29.7702	32.3883	18.3757	19.9917	230.378	250.638	8.2936	9.02298
540	East Hararge	Deder town	ET041097	301	39483	21973	2882259	0.0246098	3.22813	0.0815198	10.6932	0.0503182	6.60037	0.630845	82.7497	0.0227104	2.97899
541	East Hararge	Kumbi	ET041098	21702	27330	1584246	1995090	1.77436	2.2345	5.87755	7.40178	3.62792	4.56876	45.4837	57.279	1.63741	2.06205
542	East Hararge	Aweday town	ET041099	37482	110623	2736186	8075479	3.06453	9.04454	10.1513	29.96	6.26587	18.4928	78.5559	231.847	2.82801	8.34649
543	Bale	Agarfa	ET041104	87686	168947	6401078	12333131	7.16921	13.8131	23.748	45.7559	14.6585	28.2429	183.775	354.084	6.6159	12.747
544	Bale	Gasera	ET041106	74704	120554	5453392	8800442	6.1078	9.8565	20.2321	32.6496	12.4883	20.153	156.567	252.661	5.63641	9.09578
545	Bale	Sinana	ET041109	84107	140868	6139811	10283364	6.87659	11.5174	22.7787	38.1513	14.0602	23.5489	176.274	295.235	6.34586	10.6285
546	Bale	Goba (OR)	ET041110	42906	48072	3132138	3509256	3.50799	3.93037	11.6202	13.0193	7.1726	8.0362	89.9237	100.751	3.23725	3.62703
547	Bale	Harena Buluk	ET041111	90680	133252	6619640	9727396	7.414	10.8947	24.5589	36.0886	15.159	22.2757	190.05	279.274	6.8418	10.0538
548	Bale	Mena (Bale)	ET041112	61248	144788	4471104	10569524	5.00764	11.8379	16.5878	39.2129	10.2388	24.2042	128.365	303.451	4.62115	10.9242
549	Bale	Meda Welabu	ET041113	128740	164369	9398020	11998937	10.5258	13.4388	34.8667	44.5161	21.5215	27.4776	269.817	344.489	9.71342	12.4016
550	Bale	Berbere	ET041114	87865	149840	6414145	10938320	7.18384	12.2509	23.7965	40.5812	14.6884	25.0488	184.15	314.039	6.6294	11.3054
551	Bale	Gura Damole	ET041115	38638	52404	2820574	3825492	3.15904	4.28455	10.4643	14.1926	6.45911	8.76038	80.9787	109.83	2.91523	3.95388
552	Bale	Goro (Bale)	ET041116	83014	140012	6060022	10220876	6.78722	11.4474	22.4827	37.9194	13.8775	23.4058	173.983	293.441	6.2634	10.5639
553	Bale	Robe Town	ET041119	3329	126218	243017	9213914	0.272179	10.3196	0.901593	34.1836	0.556509	21.0999	6.97702	264.531	0.251173	9.52313
554	Bale	Goba town	ET041120	6332	63432	462236	4630536	0.517704	5.1862	1.7149	17.1793	1.05852	10.6039	13.2708	132.943	0.477749	4.78594
555	Bale	Dinsho	ET041122	35343	63908	2580039	4665284	2.88964	5.22512	9.57194	17.3082	5.90829	10.6835	74.0729	133.94	2.66663	4.82185
556	Borena	Yabelo	ET041207	53960	53993	3939080	3941489	4.41177	4.41447	14.614	14.6229	9.02049	9.02601	113.091	113.16	4.07128	4.07377
557	Borena	Arero	ET041208	41277	59697	3013221	4357881	3.37481	4.88083	11.179	16.1677	6.90028	9.97955	86.5096	125.115	3.11434	4.50413
558	Borena	Moyale (OR)	ET041210	2992	37134	218416	2710782	0.244626	3.03608	0.810323	10.057	0.500173	6.20769	6.27072	77.8266	0.225746	2.80176
559	Borena	Dire	ET041211	28120	56460	2052760	4121580	2.29909	4.61617	7.61574	15.2911	4.70082	9.43842	58.9347	118.331	2.12165	4.2599
560	Borena	Teltale	ET041212	73436	100896	5360828	7365408	6.00413	8.24926	19.8887	27.3257	12.2763	16.8668	153.909	211.461	5.54074	7.61259
561	Borena	Miyo	ET041216	45698	86526	3335954	6316398	3.73627	7.07437	12.3764	23.4338	7.63933	14.4646	95.7752	181.344	3.44791	6.52838
562	Borena	Dilo	ET041219	10280	10280	750440	750440	0.840493	0.840493	2.78413	2.78413	1.71851	1.71851	21.5451	21.5451	0.775625	0.775625
563	Borena	Dhas	ET041220	14360	14360	1048280	1048280	1.17407	1.17407	3.88912	3.88912	2.40056	2.40056	30.0961	30.0961	1.08346	1.08346
564	Borena	Gomole	ET041223	21283	21283	1553659	1553659	1.7401	1.7401	5.76407	5.76407	3.55788	3.55788	44.6055	44.6055	1.6058	1.6058
565	Borena	Guchi	ET041290	6796	8233	496108	601009	0.555641	0.67313	1.84056	2.22974	1.13609	1.37631	14.2433	17.255	0.512757	0.621179
566	Borena	Dubluk	ET041291	22606	37699	1650238	2752027	1.84827	3.08227	6.12238	10.21	3.77905	6.30214	47.3783	79.0107	1.70562	2.84439
567	Borena	Elwaya	ET041295	19611	19611	1431603	1431603	1.6034	1.6034	5.31125	5.31125	3.27837	3.27837	41.1013	41.1013	1.47965	1.47965
568	Borena	Yabelo town	ET041296	6198	78473	452454	5728529	0.506748	6.41595	1.6786	21.2528	1.03612	13.1183	12.99	164.466	0.467638	5.92078
569	Borena	Wachile	ET041298	18229	18229	1330717	1330717	1.4904	1.4904	4.93696	4.93696	3.04734	3.04734	38.2049	38.2049	1.37538	1.37538
570	South West Shewa	Ameya	ET041301	140987	195766	10292051	14290918	11.5271	16.0058	38.1835	53.0193	23.5688	32.7262	295.485	410.292	10.6375	14.7705
571	South West Shewa	Wenchi	ET041302	127611	153523	9315603	11207179	10.4335	12.552	34.5609	41.5786	21.3327	25.6644	267.451	321.758	9.62823	11.5833
572	South West Shewa	Waliso	ET041303	163213	238847	11914549	17435831	13.3443	19.5281	44.203	64.6869	27.2843	39.9281	342.067	500.583	12.3144	18.021
573	South West Shewa	Dawo	ET041304	99097	148937	7234081	10872401	8.10217	12.1771	26.8384	40.3366	16.566	24.8978	207.69	312.147	7.47686	11.2373
574	South West Shewa	Ilu	ET041305	44917	79307	3278941	5789411	3.67241	6.48414	12.1649	21.4787	7.50877	13.2578	94.1384	166.214	3.38898	5.9837
575	South West Shewa	Kersana Malima	ET041307	90790	112245	6627670	8193885	7.42299	9.17715	24.5887	30.3993	15.1774	18.764	190.28	235.246	6.85009	8.46887
576	South West Shewa	Tole	ET041308	77281	101169	5641513	7385337	6.31849	8.27158	20.93	27.3996	12.9191	16.9124	161.968	212.033	5.83084	7.63319
577	South West Shewa	Becho (SW Shewa)	ET041309	62642	131161	4572866	9574753	5.12161	10.7237	16.9653	35.5223	10.4719	21.9262	131.287	274.891	4.72633	9.89608
578	South West Shewa	Seden Sodo	ET041310	110136	123668	8039928	9027764	9.00472	10.1111	29.8281	33.493	18.4114	20.6736	230.826	259.187	8.30975	9.33074
579	South West Shewa	Woliso town	ET041311	653	84099	47669	6139227	0.0533893	6.87593	0.176852	22.7765	0.109162	14.0588	1.36858	176.257	0.0492688	6.34526
580	South West Shewa	Goro (SW Shewa)	ET041312	36296	51034	2649608	3725482	2.96756	4.17254	9.83005	13.8215	6.0676	8.53135	76.0702	106.959	2.73853	3.85051
581	South West Shewa	Sodo Daci	ET041314	78315	93040	5716995	6791920	6.40303	7.60695	21.2101	25.198	13.0919	15.5535	164.135	194.996	5.90886	7.01986
582	Guji	Uraga	ET041401	135234	231356	9872082	16888988	11.0567	18.9157	36.6254	62.6581	22.6071	38.6758	283.427	484.883	10.2034	17.4558
583	Guji	Bore	ET041402	90901	171288	6635773	12504024	7.43207	14.0045	24.6187	46.3899	15.1959	28.6342	190.513	358.991	6.85847	12.9237
584	Guji	Adola	ET041403	84610	90703	6176530	6621319	6.91771	7.41588	22.9149	24.5651	14.1443	15.1628	177.328	190.098	6.38381	6.84353
585	Guji	Wadera	ET041404	51482	72820	3758186	5315860	4.20917	5.95376	13.9429	19.7218	8.60625	12.1733	107.898	152.618	3.88431	5.49426
586	Guji	Odo Shakiso	ET041405	134554	144037	9822442	10514701	11.0011	11.7765	36.4413	39.0095	22.4934	24.0787	282.002	301.877	10.1521	10.8676
587	Guji	Liben	ET041407	52651	103470	3843523	7553310	4.30475	8.45971	14.2595	28.0228	8.80167	17.2971	110.348	216.856	3.97251	7.8068
588	Guji	Dama	ET041408	75062	83087	5479526	6065351	6.13707	6.79319	20.329	22.5025	12.5481	13.8897	157.317	174.136	5.66342	6.2689
589	Guji	Arda Jila	ET041409	33541	45031	2448493	3287263	2.74231	3.68173	9.08391	12.1957	5.60705	7.52783	70.2962	94.3773	2.53066	3.39758
590	Guji	Girja /Harenfema	ET041410	63703	90584	4650319	6612632	5.20836	7.40615	17.2527	24.5329	10.6492	15.1429	133.511	189.849	4.80638	6.83455
591	Guji	Ana Sora	ET041411	71593	111879	5226289	8167167	5.85344	9.14723	19.3895	30.3002	11.9682	18.7028	150.047	234.479	5.40168	8.44126
592	Guji	Saba Boru	ET041412	44397	50470	3240981	3684310	3.6299	4.12643	12.024	13.6688	7.42185	8.43707	93.0486	105.777	3.34975	3.80796
593	Guji	Gora Dola	ET041413	73477	105546	5363821	7704858	6.00748	8.62944	19.8998	28.585	12.2832	17.6441	153.995	221.206	5.54383	7.96343
594	Guji	Negele town	ET041414	2614	58785	190822	4291305	0.213721	4.80626	0.70795	15.9207	0.436982	9.82709	5.4785	123.203	0.197226	4.43532
595	Guji	Aga Wayu	ET041482	18438	24580	1345974	1794340	1.50749	2.00966	4.99356	6.657	3.08228	4.10904	38.6429	51.5155	1.39114	1.85456
596	Guji	Haro Walabu	ET041490	53133	58687	3878709	4284151	4.34415	4.79825	14.39	15.8942	8.88224	9.81071	111.358	122.998	4.00888	4.42793
597	Guji	Adola town	ET041492	4719	113924	344487	8316452	0.385825	9.31443	1.27805	30.854	0.788875	19.0447	9.89022	238.765	0.356048	8.59555
598	Guji	Gumi Idalo	ET041497	13745	13745	1003385	1003385	1.12379	1.12379	3.72256	3.72256	2.29775	2.29775	28.8072	28.8072	1.03706	1.03706
599	Guji	Shakiso town	ET041499	5234	120307	382082	8782411	0.427932	9.8363	1.41752	32.5827	0.874968	20.1117	10.9696	252.143	0.394905	9.07715
600	West Guji	Bule Hora	ET041501	166202	217136	12132746	15850928	13.5887	17.753	45.0125	58.8069	27.784	36.2986	348.331	455.08	12.5399	16.3829
601	West Guji	Kercha	ET041502	222167	290379	16218191	21197667	18.1644	23.7414	60.1695	78.6433	37.1397	48.5427	465.624	608.585	16.7625	21.9091
602	West Guji	Hambela Wamena	ET041509	161614	181337	11797822	13237601	13.2136	14.8261	43.7699	49.1115	27.017	30.3141	338.715	380.052	12.1938	13.6819
603	West Guji	Abaya	ET041513	146072	184192	10663256	13446016	11.9428	15.0595	39.5607	49.8847	24.4189	30.7914	306.142	386.035	11.0211	13.8973
604	West Guji	Dugda Dawa	ET041515	66365	96300	4844645	7029900	5.426	7.87349	17.9736	26.0809	11.0942	16.0985	139.09	201.828	5.00723	7.26582
605	West Guji	Gelana (West Guji)	ET041517	78811	97666	5753203	7129618	6.44359	7.98517	21.3444	26.4509	13.1748	16.3268	165.174	204.691	5.94628	7.36889
606	West Guji	Melka Soda	ET041518	65047	77616	4748431	5665968	5.31824	6.34588	17.6167	21.0207	10.8739	12.9751	136.327	162.67	4.90779	5.85612
607	West Guji	Bule Hora town	ET041587	158	208046	11534	15187358	0.0129181	17.0098	0.0427911	56.3451	0.0264129	34.779	0.331141	436.029	0.0119211	15.697
608	West Guji	Suro Berguda	ET041594	47189	57318	3444797	4184214	3.85817	4.68632	12.7802	15.5234	7.88859	9.58185	98.9001	120.129	3.5604	4.32464
609	West Guji	Birbirsa Kojowa	ET041596	89737	109136	6550801	7966928	7.3369	8.92296	24.3035	29.5573	15.0013	18.2443	188.073	228.731	6.77065	8.2343
610	Buno Bedele	Chora (Buno Bedele)	ET041603	111084	156421	8109132	11418733	9.08223	12.789	30.0849	42.3635	18.5699	26.1489	232.813	327.832	8.38127	11.8019
611	Buno Bedele	Dega	ET041604	44022	53486	3213606	3904478	3.59924	4.37302	11.9225	14.4856	7.35916	8.94125	92.2626	112.098	3.32145	4.03551
612	Buno Bedele	Dabo Hana	ET041605	49059	57498	3581307	4197354	4.01106	4.70104	13.2866	15.5722	8.20119	9.61194	102.819	120.506	3.7015	4.33822
613	Buno Bedele	Gechi	ET041606	72083	95487	5262059	6970551	5.89351	7.80702	19.5222	25.8607	12.0501	15.9626	151.074	200.125	5.43865	7.20448
614	Buno Bedele	Borecha	ET041607	88154	127100	6435242	9278300	7.20747	10.3917	23.8747	34.4225	14.7367	21.2473	184.756	266.38	6.65121	9.58968
615	Buno Bedele	Dedesa	ET041608	95282	171880	6955586	12547240	7.79026	14.0529	25.8052	46.5503	15.9283	28.7332	199.695	360.231	7.18902	12.9683
616	Buno Bedele	Meko	ET041618	30034	39966	2192482	2917518	2.45558	3.26762	8.13411	10.824	5.02078	6.68112	62.9462	83.7619	2.26606	3.01543
617	Buno Bedele	Bedele town	ET041621	5050	56623	368650	4133479	0.412888	4.6295	1.36769	15.3352	0.844208	9.46567	10.5839	118.672	0.381022	4.2722
618	Buno Bedele	Bedele Zuria	ET041622	83940	92997	6127620	6788781	6.86293	7.60343	22.7335	25.1864	14.0322	15.5463	175.924	194.906	6.33326	7.01661
619	Buno Bedele	Chwaka	ET041623	61165	98558	4465045	7194734	5.00085	8.0581	16.5653	26.6925	10.225	16.4759	128.191	206.561	4.61489	7.43619
620	West Arsi	Dodola town	ET041700	531	149033	38763	10879409	0.0434146	12.1849	0.143811	40.3626	0.0887673	24.9138	1.11289	312.348	0.0400639	11.2445
621	West Arsi	Siraro	ET041701	219386	243657	16015178	17786961	17.937	19.9214	59.4163	65.9896	36.6748	40.7321	459.796	510.664	16.5526	18.3839
622	West Arsi	Shala	ET041702	178321	227026	13017433	16572898	14.5795	18.5616	48.2947	61.4855	29.8099	37.9519	373.731	475.808	13.4543	17.1291
623	West Arsi	Arsi Negele	ET041703	127290	182677	9292170	13335421	10.4072	14.9357	34.474	49.4744	21.2791	30.5381	266.778	382.86	9.60402	13.783
624	West Arsi	Kofele	ET041704	142487	295964	10401551	21605372	11.6497	24.198	38.5898	80.1559	23.8196	49.4763	298.629	620.29	10.7506	22.3304
625	West Arsi	Kore	ET041705	100848	161299	7361904	11774827	8.24533	13.1878	27.3127	43.6846	16.8588	26.9644	211.36	338.055	7.60897	12.17
626	West Arsi	Gedeb Asasa	ET041706	168697	311614	12314881	22747822	13.7927	25.4776	45.6882	84.3944	28.2011	52.0925	353.56	653.09	12.7282	23.5112
627	West Arsi	Dodola	ET041707	118046	172480	8617358	12591040	9.65144	14.102	31.9704	46.7128	19.7337	28.8335	247.404	361.489	8.90656	13.0136
628	West Arsi	Kokosa	ET041708	111586	218663	8145778	15962399	9.12327	17.8779	30.2208	59.2205	18.6538	36.5539	233.865	458.28	8.41915	16.4981
629	West Arsi	Nenesebo	ET041709	120619	198977	8805187	14525321	9.86181	16.2684	32.6672	53.8889	20.1639	33.263	252.797	417.022	9.10069	15.0128
630	West Arsi	Adaba	ET041710	122343	220892	8931039	16125116	10.0028	18.0601	33.1342	59.8242	20.4521	36.9265	256.41	462.952	9.23076	16.6663
631	West Arsi	Shashemene town	ET041711	0	150609	0	10994457	0	12.3138	0	40.7894	0	25.1773	0	315.651	0	11.3634
632	West Arsi	Shashemene Zuria	ET041712	87900	368100	6416700	26871300	7.1867	30.0959	23.806	99.6925	14.6942	61.5353	184.223	771.475	6.63204	27.7731
633	West Arsi	Heban Arsi	ET041783	44504	58682	3248792	4283786	3.63865	4.79784	12.053	15.8928	7.43973	9.80987	93.2728	122.987	3.35782	4.42755
634	West Arsi	Wondo	ET041797	16351	16351	1193623	1193623	1.33686	1.33686	4.42834	4.42834	2.7334	2.7334	34.2689	34.2689	1.23368	1.23368
635	West Arsi	Bishan Guracha	ET041798	8097	34930	591081	2549890	0.662011	2.85588	2.19291	9.46009	1.35358	5.83925	16.9699	73.2073	0.610918	2.63546
636	West Arsi	Arsi Negele town	ET041799	9301	189357	678973	13823061	0.76045	15.4818	2.51899	51.2836	1.55485	31.6548	19.4933	396.86	0.701759	14.287
637	Kelem Wellega	Hawa Galan	ET041801	69903	145705	5102919	10636465	5.71527	11.9128	18.9318	39.4613	11.6857	24.3575	146.505	305.373	5.27417	10.9934
638	Kelem Wellega	Yama Logi Welel	ET041802	64632	81802	4718136	5971546	5.28431	6.68813	17.5043	22.1544	10.8045	13.6748	135.458	171.443	4.87648	6.17195
639	Kelem Wellega	Dale Wabera	ET041803	72861	121610	5318853	8877530	5.95712	9.94283	19.7329	32.9356	12.1802	20.3295	152.704	254.874	5.49735	9.17546
640	Kelem Wellega	Gawo Kebe	ET041804	71202	91869	5197746	6706437	5.82148	7.51121	19.2836	24.8809	11.9028	15.3577	149.227	192.542	5.37218	6.93151
641	Kelem Wellega	Sayo	ET041805	92530	102324	6754690	7469652	7.56525	8.36601	25.0599	27.7124	15.4682	17.1055	193.927	214.454	6.98138	7.72033
642	Kelem Wellega	Denbi Dollo town	ET041806	4097	157744	299081	11515312	0.334971	12.8971	1.10959	42.7218	0.684895	26.3701	8.58662	330.605	0.309118	11.9018
643	Kelem Wellega	Anfilo	ET041807	73022	138495	5330606	10110135	5.97028	11.3234	19.7765	37.5086	12.2071	23.1522	153.042	290.262	5.5095	10.4494
644	Kelem Wellega	Dale Sadi	ET041808	83786	129120	6116378	9425760	6.85034	10.5569	22.6918	34.9696	14.0065	21.585	175.601	270.614	6.32164	9.74209
645	Kelem Wellega	Gidami	ET041809	109316	168621	7980068	12309333	8.93768	13.7865	29.6061	45.6676	18.2744	28.1884	229.108	353.401	8.24788	12.7224
646	Kelem Wellega	Jimma Horo	ET041810	46731	53072	3411363	3874256	3.82073	4.33917	12.6562	14.3735	7.81202	8.87205	97.9402	111.23	3.52585	4.00428
647	Kelem Wellega	Lalo Kile	ET041811	52130	86940	3805490	6346620	4.26215	7.10821	14.1184	23.546	8.71457	14.5338	109.256	182.211	3.9332	6.55961
648	Kelem Wellega	Sedi Chenka	ET041812	41513	57554	3030449	4201442	3.3941	4.70562	11.243	15.5873	6.93973	9.6213	87.0042	120.623	3.13215	4.34244
649	Horo Gudru Wellega	Horo	ET041901	49850	62840	3639050	4587320	4.07574	5.1378	13.5009	17.019	8.33342	10.505	104.477	131.702	3.76118	4.74127
650	Horo Gudru Wellega	Shambu town	ET041902	839	36513	61247	2665449	0.0685966	2.9853	0.227226	9.88882	0.140256	6.10388	1.7584	76.525	0.0633024	2.7549
651	Horo Gudru Wellega	Guduru	ET041903	71737	100268	5236801	7319564	5.86522	8.19791	19.4285	27.1556	11.9923	16.7618	150.349	210.145	5.41255	7.56521
652	Horo Gudru Wellega	Ababo	ET041904	53008	76291	3869584	5569243	4.33393	6.23755	14.3562	20.6619	8.86135	12.7536	111.096	159.893	3.99945	5.75615
653	Horo Gudru Wellega	Abay Chomen	ET041905	38390	81124	2802470	5922052	3.13877	6.6327	10.3972	21.9708	6.41766	13.5615	80.4589	170.022	2.89652	6.1208
654	Horo Gudru Wellega	Jimma Genete	ET041906	71691	95750	5233443	6989750	5.86146	7.82852	19.4161	25.932	11.9846	16.0065	150.252	200.676	5.40908	7.22433
655	Horo Gudru Wellega	Jimma Rare	ET041907	46527	94557	3396471	6902661	3.80405	7.73098	12.6009	25.6089	7.77792	15.8071	97.5127	198.175	3.51046	7.13431
656	Horo Gudru Wellega	Jarte Jardega	ET041908	57923	74488	4228379	5437624	4.73578	6.09014	15.6873	20.1736	9.68299	12.4522	121.397	156.114	4.37028	5.62011
657	Horo Gudru Wellega	Amuru	ET041909	54653	89285	3989669	6517805	4.46843	7.29994	14.8017	24.1811	9.13634	14.9258	114.543	187.126	4.12356	6.73654
658	Horo Gudru Wellega	Abe Dongoro	ET041910	70824	97923	5170152	7148379	5.79057	8.00618	19.1813	26.5205	11.8396	16.3698	148.435	205.23	5.34366	7.38828
659	Horo Gudru Wellega	Choman Guduru	ET041911	36935	47253	2696255	3449469	3.01981	3.86341	10.0031	12.7975	6.17442	7.89928	77.4095	99.0343	2.78674	3.56523
660	Horo Gudru Wellega	Horo Buluk	ET041912	55281	68542	4035513	5003566	4.51977	5.60399	14.9718	18.5632	9.24132	11.4582	115.86	143.652	4.17094	5.17149
661	Finfine Special	Burayu	ET042001	32346	106876	2361258	7801948	2.64461	8.73818	8.76027	28.9452	5.40728	17.8665	67.7917	223.994	2.4405	8.06378
662	Finfine Special	Lege Tafo-Lege Dadi town	ET042004	8753	59220	638969	4323060	0.715645	4.84183	2.37057	16.0386	1.46324	9.89981	18.3448	124.115	0.660413	4.46814
663	Finfine Special	Sululta town	ET042005	3205	46053	233965	3361869	0.262041	3.76529	0.86801	12.4725	0.53578	7.69868	6.71714	96.5193	0.241817	3.47469
664	Finfine Special	Sebeta Hawas	ET042006	54588	61457	3984924	4486361	4.46311	5.02472	14.7841	16.6444	9.12548	10.2738	114.407	128.803	4.11866	4.63692
665	Finfine Special	Dukem	ET042008	0	4770	0	348210	0	0.389995	0	1.29186	0	0.797401	0	9.99711	0	0.359896
666	Finfine Special	Sebeta town	ET042009	18136	236344	1323928	17253112	1.4828	19.3235	4.91177	64.009	3.0318	39.5096	38.01	495.337	1.36836	17.8321
667	Finfine Special	Bereh	ET042011	48976	63912	3575248	4665576	4.00428	5.22545	13.2642	17.3093	8.18732	10.6842	102.645	133.949	3.69523	4.82215
668	Finfine Special	Akaki	ET042012	33799	46545	2467327	3397785	2.76341	3.80552	9.15378	12.6058	5.65018	7.78093	70.837	97.5504	2.55013	3.51181
669	Finfine Special	Sululta	ET042013	91646	189345	6690158	13822185	7.49298	15.4808	24.8205	51.2803	15.3205	31.6528	192.074	396.835	6.91468	14.2861
670	Finfine Special	Welmera	ET042014	77407	143781	5650711	10496013	6.3288	11.7555	20.9641	38.9402	12.9401	24.0359	162.232	301.341	5.84035	10.8483
671	Finfine Special	Mulo	ET042016	29781	38370	2174013	2801010	2.43489	3.13713	8.06559	10.3917	4.97849	6.41431	62.4159	80.417	2.24697	2.89501
672	Finfine Special	Sendafa town	ET042018	1151	15353	84023	1120769	0.0941058	1.25526	0.311725	4.15805	0.192413	2.56656	2.4123	32.1773	0.0868428	1.15838
673	Finfine Special	Holeta town	ET042020	7449	46061	543777	3362453	0.60903	3.76595	2.01741	12.4747	1.24525	7.70002	15.6118	96.536	0.562026	3.4753
674	Finfine Special	Gelana (Finfine)	ET042098	5566	32603	406318	2380019	0.455076	2.66562	1.50744	8.82987	0.930468	5.45024	11.6654	68.3303	0.419954	2.45989
675	East Bale	Gololcha Bale	ET042101	93071	165520	6794183	12082960	7.60948	13.5329	25.2064	44.8278	15.5587	27.67	195.061	346.902	7.0222	12.4885
676	East Bale	Lege Hida	ET042102	64487	98508	4707551	7191084	5.27246	8.05401	17.465	26.6789	10.7803	16.4676	135.154	206.456	4.86554	7.43242
677	East Bale	Ginir	ET042103	122056	169178	8910088	12349994	9.9793	13.832	33.0564	45.8185	20.4041	28.2815	255.809	354.568	9.20911	12.7645
678	East Bale	Rayitu	ET042104	26368	46267	1924864	3377491	2.15585	3.78279	7.14125	12.5305	4.40794	7.73445	55.2628	96.9678	1.98946	3.49084
679	East Bale	Seweyna	ET042105	94030	117688	6864190	8591224	7.68789	9.62217	25.4661	31.8734	15.719	19.6739	197.071	246.654	7.09455	8.87955
680	East Bale	Dawe Ketchen	ET042106	75396	115671	5503908	8443983	6.16438	9.45726	20.4195	31.3272	12.6039	19.3367	158.017	242.427	5.68862	8.72736
681	East Bale	Ginir town	ET042107	1262	55411	92126	4045003	0.103181	4.5304	0.341787	15.007	0.210969	9.26306	2.64494	116.132	0.0952177	4.18075

## Sheet: Statistics
Spalte1	PopulationRural2020	PopulationTotal2020	FecesRural_kg	FecesTotal_kg	PhosphorusRuralTonnes	PhosphorusTotalTonnes	NitrogenRuralTonnes	NitrogenTotalTonnes	PotassiumRuralTonnes	PotassiumTotalTonnes	CH4RuralCubicMeter	CH4TotalCubicMeter	EnergyRuralGJ	EnergyTotalGJ
Sum	26987013	44028631	1970051949	3214090063	2206.46	3599.78	7308.89	11924.3	4511.42	7360.27	56560.2	92276.5	2036.17	3321.95
Maximum	341320	520688	24916360	38010224	27.9063	42.5715	92.4397	141.018	57.0585	87.0434	715.349	1091.27	25.7526	39.2858
Minimum	0	4770	0	348210	0	0.389995	0	1.29186	0	0.797401	0	9.99711	0	0.359896
Mean	80558.2	131429	5.88075e+06	9.5943e+06	6.58644	10.7456	21.8176	35.5948	13.4669	21.9709	168.836	275.452	6.07811	9.91628
Median	73436	111879	5360828	8167167	6.00413	9.14723	19.8887	30.3002	12.2763	18.7028	153.909	234.479	5.54074	8.44126
StandardDeviation	59297	80335.4	4.32868e+06	5.86448e+06	4.84812	6.56822	16.0594	21.7572	9.91268	13.4297	124.276	168.369	4.47395	6.06129
