# Supplementary material for: Spatial Modeling and Review of Human Fecal Waste Re-Use in Rural Oromia, Ethiopia: Biomethane and Nutrient Recovery Potential
Source: Research Square preprint supplement (doi:10.21203/rs.3.rs-7768593/v1), 2025-11-14
Supplement: Supplementary file 2 [file 9f0192de82f330b3c2111671.docx]

**Highlights**

• Rural Oromia generates ~2 Mt feces yearly with high recovery potential

• Biomethane potential reaches 775 million m³ CH₄ (~27.9 PJ energy/year)

• Annual Recoverable NPK equals 2.6 billion birr in synthetic fertilizer value

• Spatial hotspots identified for targeted sanitation-energy interventions

• GIS-based modeling supports circular economy sanitation in Ethiopia
